# Supplementary material for: Electrochemical conversion of methane to ethylene in a solid oxide electrolyzer
Source: PubMed Central journal article supplement (PMC6414614; doi:10.1038/s41467-019-09083-3), 2019-03-12
Supplement: 41467_2019_9083_MOESM1_ESM.pdf [file 41467_2019_9083_MOESM1_ESM.pdf]

## **Supplementary Information**

**Electrochemical conversion of methane to ethylene in a solid oxide electrolyser**

Zhu et al.

## Supplementary Figures

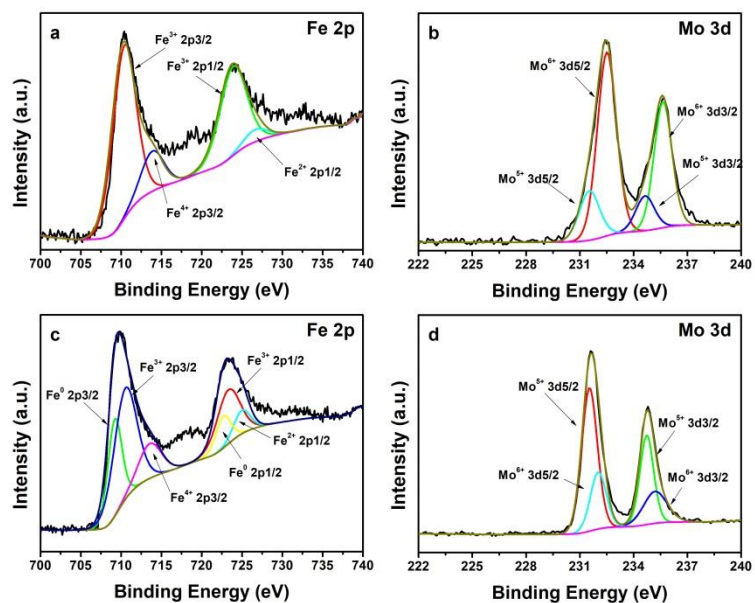

**Supplementary Fig. 1.** Chemical states of Fe and Mo. X-ray photoelectron spectra of Fe 2p (a) and Mo 3d (b) in the oxidized 0.075Fe-SFMO sample and Fe 2p (c) and Mo 3d (d) in reduced 0.075Fe-SFMO sample. Here the 0.075Fe-SFMO denotes the chemical formula of  $\text{Sr}_2\text{Fe}_{1.575}\text{Mo}_{0.5}\text{O}_{6-\delta}$  and the reduction treatment leads to the exsolution of the metallic iron nanoparticles.

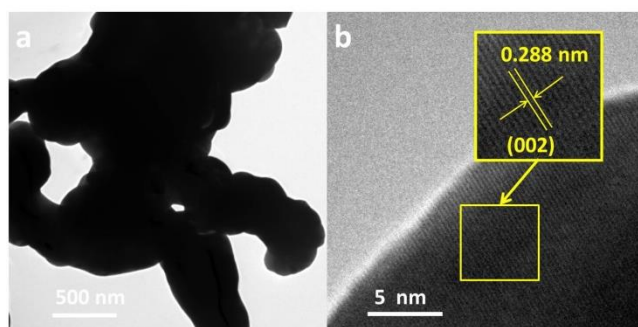

**Supplementary Fig. 2.** TEM results of the oxidized 0.075Fe-SFMO scaffold. The porous microstructure is shown in (a) while the lattice spacing of 0.288 nm in (b) is in accordance with (002) plane. Here the 0.075Fe-SFMO denotes the chemical formula of  $\text{Sr}_2\text{Fe}_{1.575}\text{Mo}_{0.5}\text{O}_{6.6}$ .

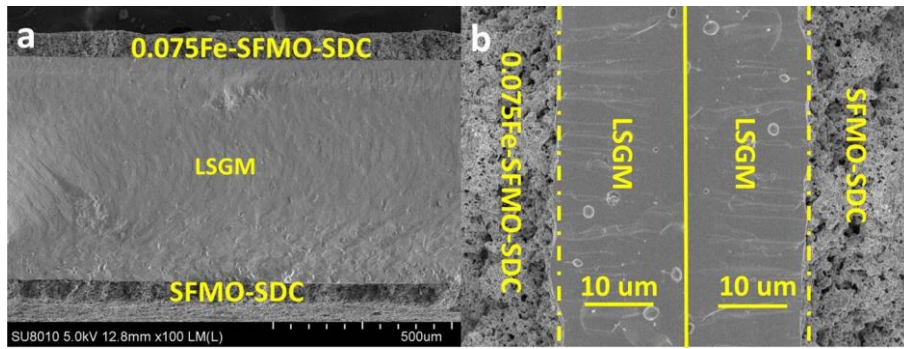

**Supplementary Fig. 3.** Cross-sectional SEM images for LSGM electrolyte-supported single cells with porous electrodes. Here the  $\text{Sr}_2\text{Fe}_{1.5}\text{Mo}_{0.5}\text{O}_{6-\delta}$ ,  $\text{La}_{0.9}\text{Sr}_{0.1}\text{Ga}_{0.8}\text{Mg}_{0.2}\text{O}_{3-\delta}$  and  $\text{Ce}_{0.8}\text{Sm}_{0.2}\text{O}_{2-\delta}$  are denoted as SFMO, LSGM and SDC, respectively. (a) shows the cross-section of the entire cell while (b) is the enlarged view of the two electrode/electrolyte interfaces with the porous electrode and dense electrolyte.

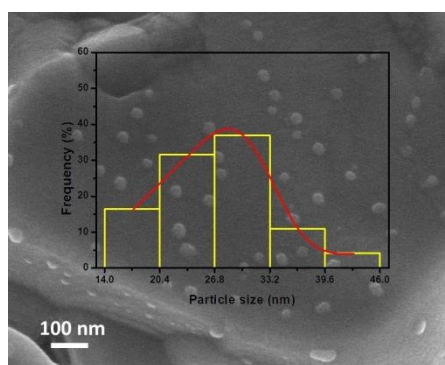

**Supplementary Fig. 4.** Microstructure of 0.075Fe-SFMO electrode. SEM image of the porous 0.075Fe-SFMO electrode after reduction and the iron nanoparticles have an average size of ~25 nm on the porous scaffolds. Here the 0.075Fe-SFMO denotes the  $\text{Sr}_2\text{Fe}_{1.575}\text{Mo}_{0.5}\text{O}_{6-\delta}$  after reduction with iron nanoparticles anchoring on the substrate.

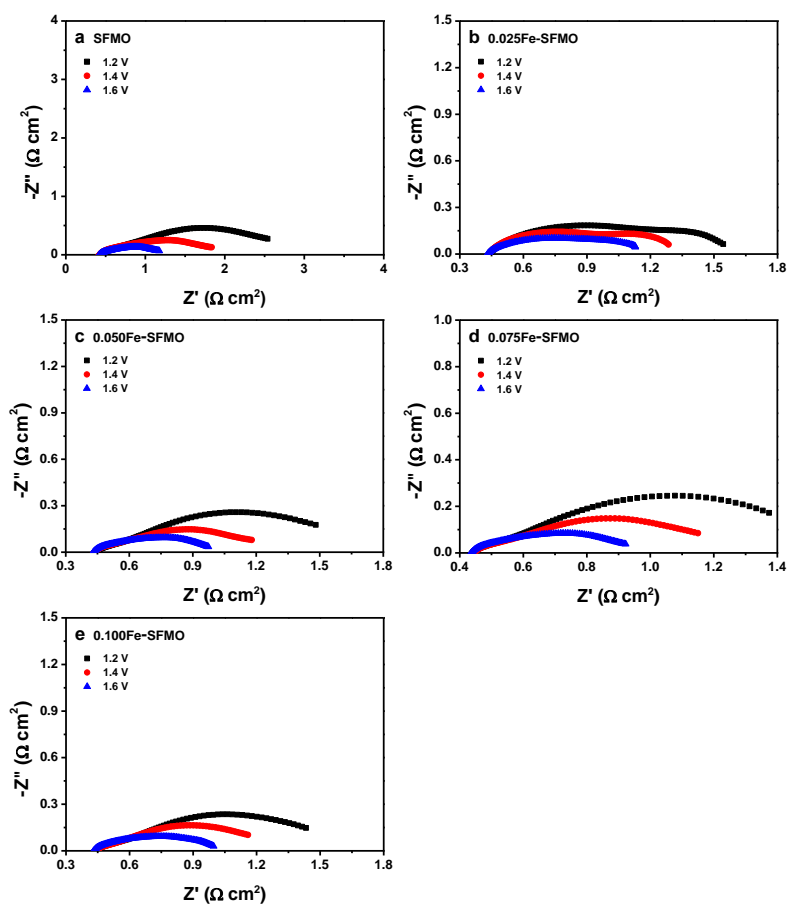

**Supplementary Fig. 5.** AC impedance of single cells with electrochemical oxidation of  $\text{CH}_4$  in different anodes while the  $\text{O}_2$  electrolysis is performed in the SFMO cathode at different applied voltages at  $850\text{ }^\circ\text{C}$ . The chemical formulas of  $\text{Sr}_2\text{Fe}_{1.5}\text{Mo}_{0.5}\text{O}_{6-\delta}$ ,  $\text{Sr}_2\text{Fe}_{1.525}\text{Mo}_{0.5}\text{O}_{6-\delta}$ ,  $\text{Sr}_2\text{Fe}_{1.55}\text{Mo}_{0.5}\text{O}_{6-\delta}$ ,  $\text{Sr}_2\text{Fe}_{1.575}\text{Mo}_{0.5}\text{O}_{6-\delta}$  and  $\text{Sr}_2\text{Fe}_{1.6}\text{Mo}_{0.5}\text{O}_{6-\delta}$  are denoted as SFMO, 0.025Fe-SFMO, 0.050Fe-SFMO, 0.075Fe-SFMO and 0.100Fe-SFMO, respectively.

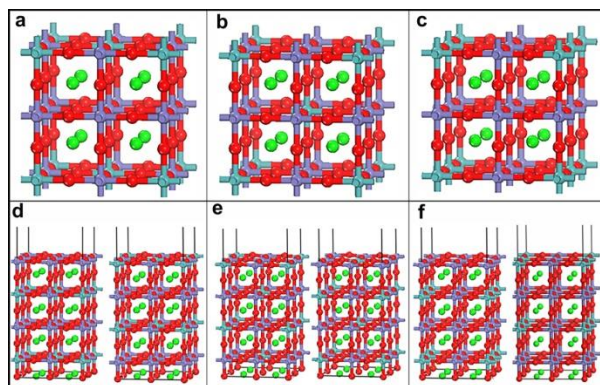

**Supplementary Fig. 6.**  $\text{Sr}_2\text{Fe}_{1.5}\text{Mo}_{0.5}\text{O}_6$  cubic supercells of bulk SFMO with different distributions of Mo atom. (a) plane diagonal-Mo (b) body diagonal-Mo (c) plane adjacent-Mo. And (d-f) are the SFMO (001) surface models constructed of different terminated surfaces, respectively. Strontium in green, iron in purple, molybdenum in blue, oxygen in red.

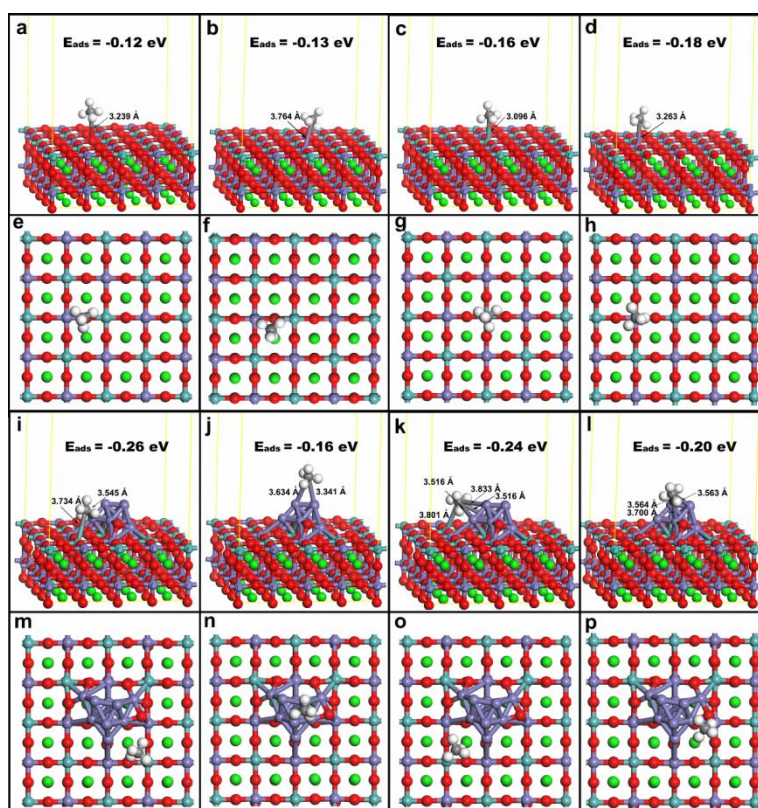

**Supplementary Fig. 7.** Adsorption configurations of  $\text{CH}_4$  at surface and interface. The optimized adsorption configurations of  $\text{CH}_4$  on (a-h) the SFMO (001) surface system and (i-p) Fe/SFMO (001) surface system. The top panels show side views while the bottom panels give top views of  $\text{CH}_4$  adsorbed on the system. The adsorption energies of  $\text{CH}_4$  are listed and the main bond lengths are marked. Strontium in green, iron in purple, molybdenum in blue, oxygen in red, carbon in grey and hydrogen in white.



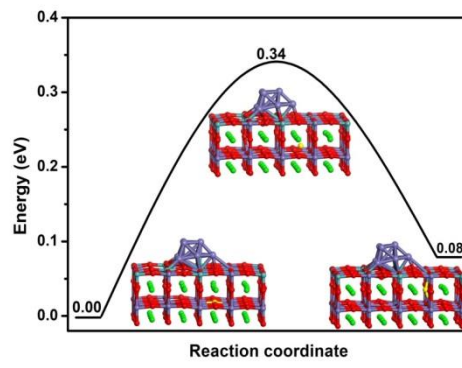

**Supplementary Fig. 8.** The activation energy barrier of oxygen transfer process through oxygen vacancy sites. Strontium in green, iron in purple, molybdenum in blue, oxygen in red and yellow.

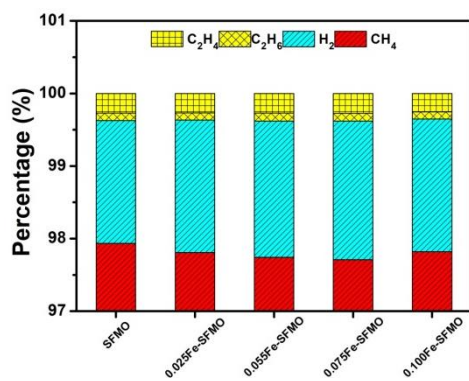

**Supplementary Fig. 9.** Contrast experiment of ethylene splitting. The ethylene generation from thermal splitting methane in the cell without externally applied voltages at operation temperature of 850 °C.

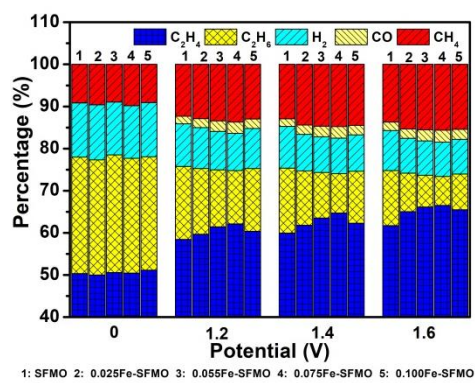

**Supplementary Fig. 10.** Electrochemical oxidation of C<sub>2</sub>H<sub>6</sub>. The product analysis of electrochemical oxidation of C<sub>2</sub>H<sub>6</sub> in the anode in conjunction with O<sub>2</sub> electrolysis from air in the cathode at ambient pressure and 850°C.

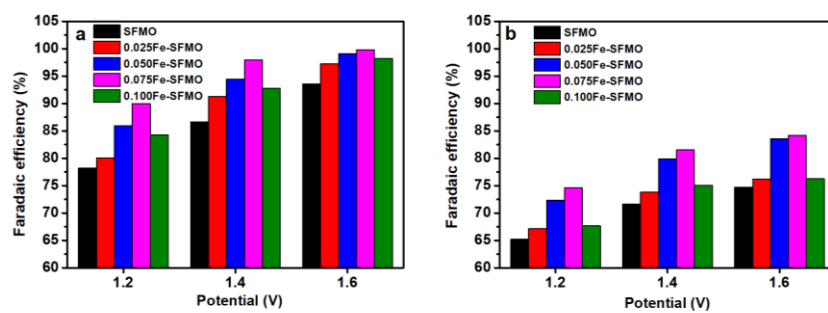

**Supplementary Fig. 11.** Faraday efficiency of electrochemical process. Faraday efficiency of CH<sub>4</sub> oxidation with (a) O<sub>2</sub> electrolysis and (b) CO<sub>2</sub> electrolysis using various cathodes and different voltages at 850 °C.

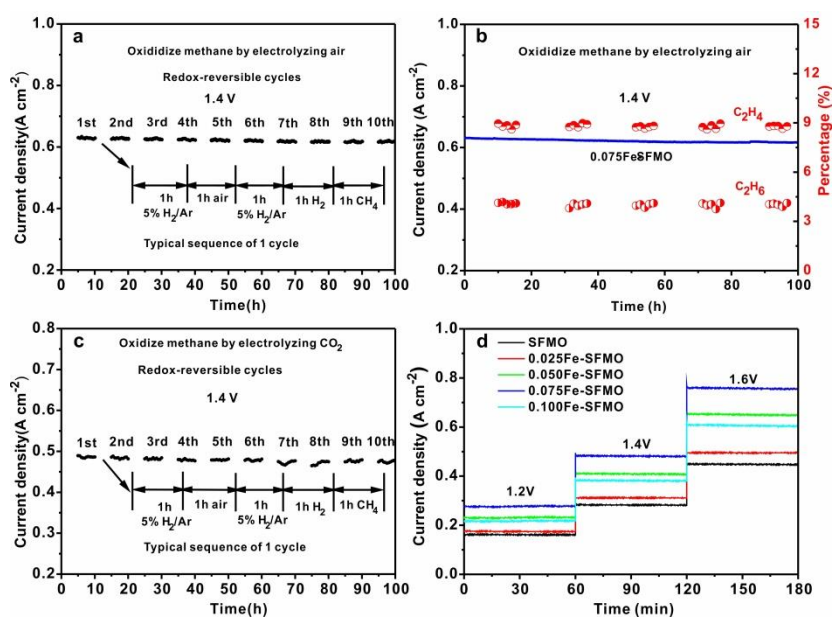

**Supplementary Fig. 12.** Electrochemical measurement of single cells. (a) The redox-cycling performance of the cell with 0.075Fe-SFMO-SDC anode for oxidizing methane by electrolyzing air at 850 °C. (b) The long-term performance of the cell with 0.075Fe-SFMO-SDC anode for oxidizing methane by electrolyzing air with the percentage of CH<sub>4</sub> conversion to C<sub>2</sub>H<sub>4</sub> and C<sub>2</sub>H<sub>6</sub> at 850 °C. (c) The redox-cycling performance of the cell with 0.075Fe-SFMO-SDC anode for oxidizing methane by electrolyzing CO<sub>2</sub> at 850 °C. (d) The short-term operation of oxidizing methane by electrolyzing CO<sub>2</sub> at different voltages.

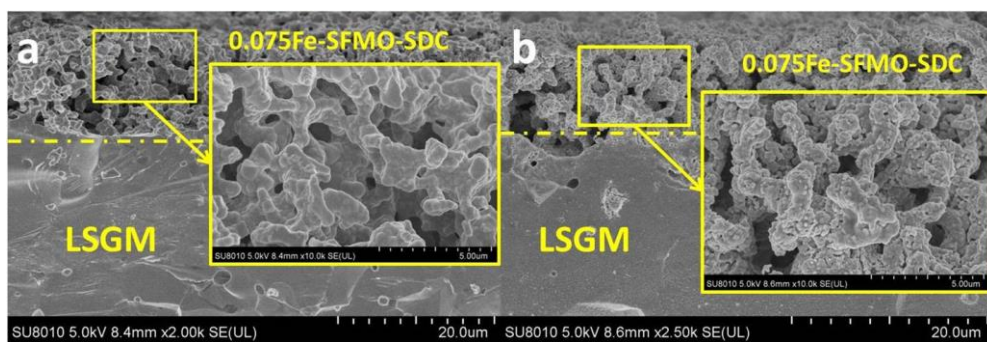

**Supplementary Fig. 13.** SEM images of the 0.075Fe-SFM/SDC electrodes. (a) represents the porous electrode before reduction while (b) is the microstructure after the redox cycling experiment over 100 hours test.

## Supplementary Tables

**Supplementary Table 1.** Oxygen nonstoichiometry of samples before and after nanoparticle exsolution. The oxygen is determined using iodometric titration while the amounts of excess iron in the lattice of SFMO are in a linear relationship with the further oxygen loss after reduction.

| Samples      | Chemical formula                                                 | Oxidized state (6- $\delta$ ) | Reduced state (6- $\delta$ ) | Oxygen loss |
|--------------|------------------------------------------------------------------|-------------------------------|------------------------------|-------------|
| SFMO         | $\text{Sr}_2\text{Fe}_{1.5}\text{Mo}_{0.5}\text{O}_{6-\delta}$   | 5.6616                        | 5.4151                       | 0.2465      |
| 0.025Fe-SFMO | $\text{Sr}_2\text{Fe}_{1.525}\text{Mo}_{0.5}\text{O}_{6-\delta}$ | 5.6940                        | 5.3963                       | 0.2977      |
| 0.05Fe-SFMO  | $\text{Sr}_2\text{Fe}_{1.55}\text{Mo}_{0.5}\text{O}_{6-\delta}$  | 5.7344                        | 5.3693                       | 0.3651      |
| 0.075Fe-SFMO | $\text{Sr}_2\text{Fe}_{1.575}\text{Mo}_{0.5}\text{O}_{6-\delta}$ | 5.7664                        | 5.3771                       | 0.3893      |
| 0.100Fe-SFMO | $\text{Sr}_2\text{Fe}_{1.6}\text{Mo}_{0.5}\text{O}_{6-\delta}$   | 5.7838                        | 5.4732                       | 0.3105      |
